# Supplementary material for: Preparation of a cattle bone collagen peptide–calcium chelate by the ultrasound method and its structural characterization, stability analysis, and bioactivity on MC3T3-E1 cells
Source: Royal Society of Chemistry journal article supplement (doi:10.1039/d2fo02146c), 2022-12-15
Supplement: d2fo02146c1.pdf [file d2fo02146c1.pdf]

Table S1 Docking score of collagen peptides and CaMKII.

| Collagen peptides        | Sequence | -CDOCKER<br>energy<br>(kcal/mol) | -CDOCKER<br>interaction energy<br>(kcal/mol) | Molecular weight |
|--------------------------|----------|----------------------------------|----------------------------------------------|------------------|
| E-Lig (positive control) | –        | 44.6786                          | 74.8737                                      | –                |
| Ser-Gly-Glu              | SGE      | 74.2159                          | 66.2844                                      | 292.11           |
| Thr-Gly-Glu              | TGE      | 79.4866                          | 61.8682                                      | 306.13           |
| Ala-Gly-Glu              | AGE      | 79.5302                          | 67.5198                                      | 276.12           |
| Ala-Ser-Gly-Glu          | ASGE     | 85.8736                          | 78.0877                                      | 363.15           |
| Gly-Glu-Ala-Gly-Ala-Gln  | GEAGAQ   | 123.286                          | 91.3123                                      | 532.24           |
| Gly-Pro-Ala-Gly-Glu      | GPAGE    | 80.7422                          | 67.5909                                      | 430.19           |
| Gly-Pro-Ala-Gly-Glu-Arg  | GPAGER   | 86.3603                          | 82.0704                                      | 293.65           |
| Gly-Asp-Thr-Gly-Ala-Lys  | GDTGAK   | 121.996                          | 93.5175                                      | 548.27           |

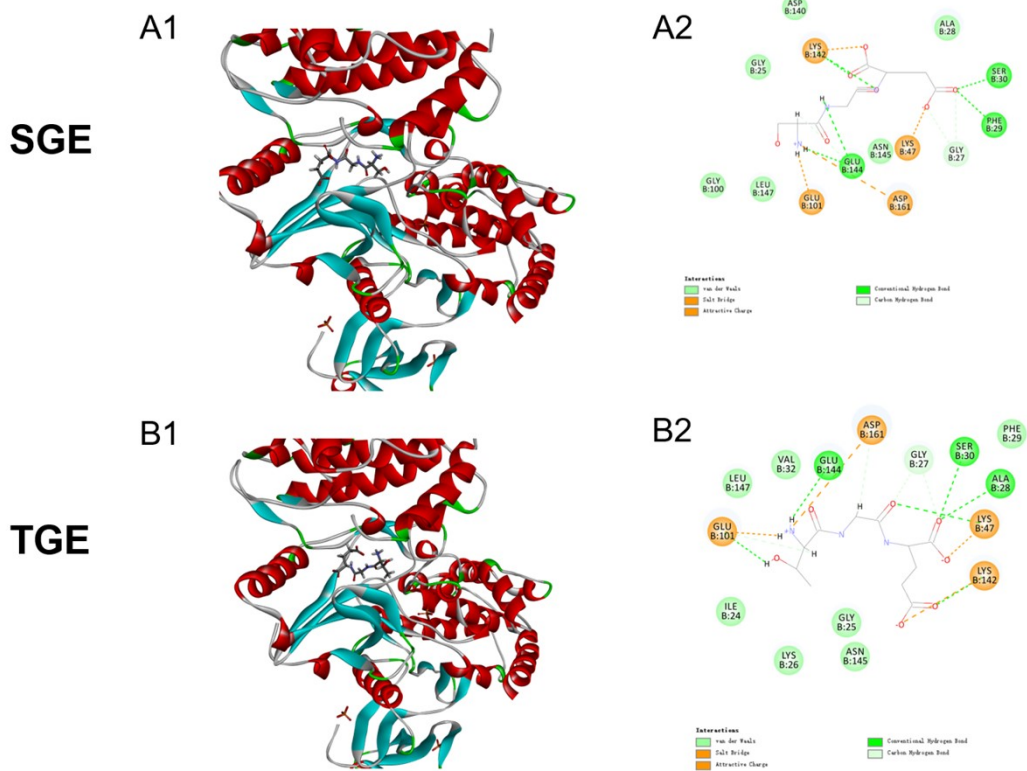

Fig. S1 Molecular docking analysis. (A1) The predicted binding sites of Ser-Gly-Glu in the active pocket of CaMKII; (A2) The detail binding mode between Ser-Gly-Glu and active pocket; (B1) The predicted binding sites of Thr-Gly-Glu in the active pocket of CaMKII; (B2) The detail binding mode between Thr-Gly-Glu and active pocket.

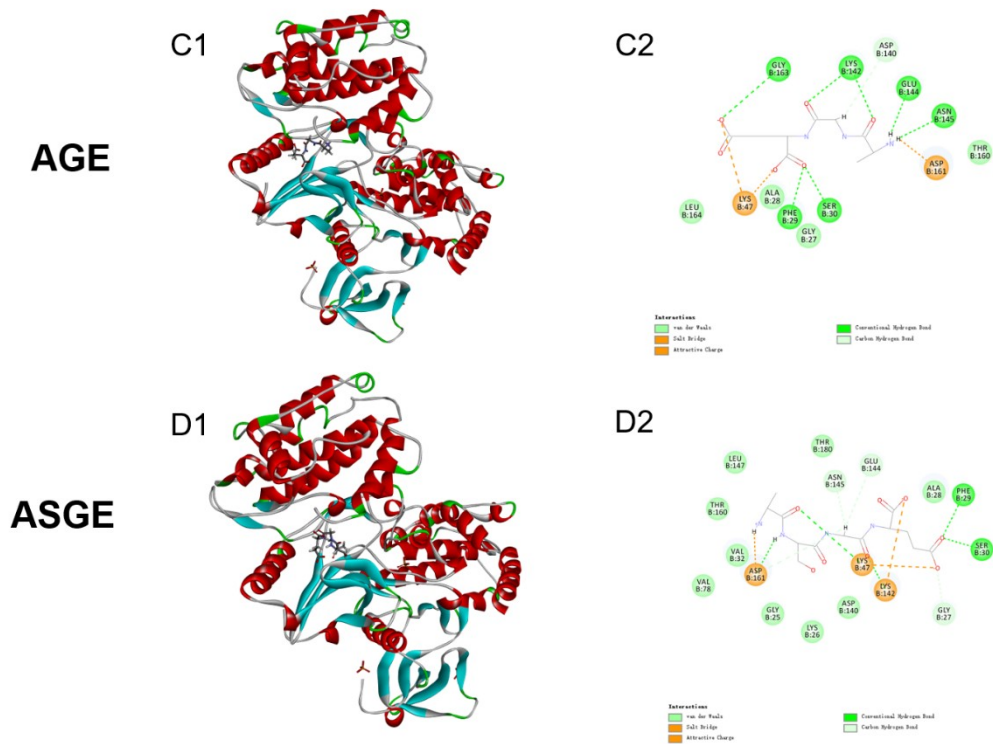

Fig. S2 Molecular docking analysis. (C1) The predicted binding sites of Ala-Gly-Glu in the active pocket of CaMKII; (C2) The detail binding mode between Ala-Gly-Glu and active pocket; (D1) The predicted binding sites of Ala-Ser-Gly-Glu in the active pocket of CaMKII; (D2) The detail binding mode between Ala-Ser-Gly-Glu and active pocket.

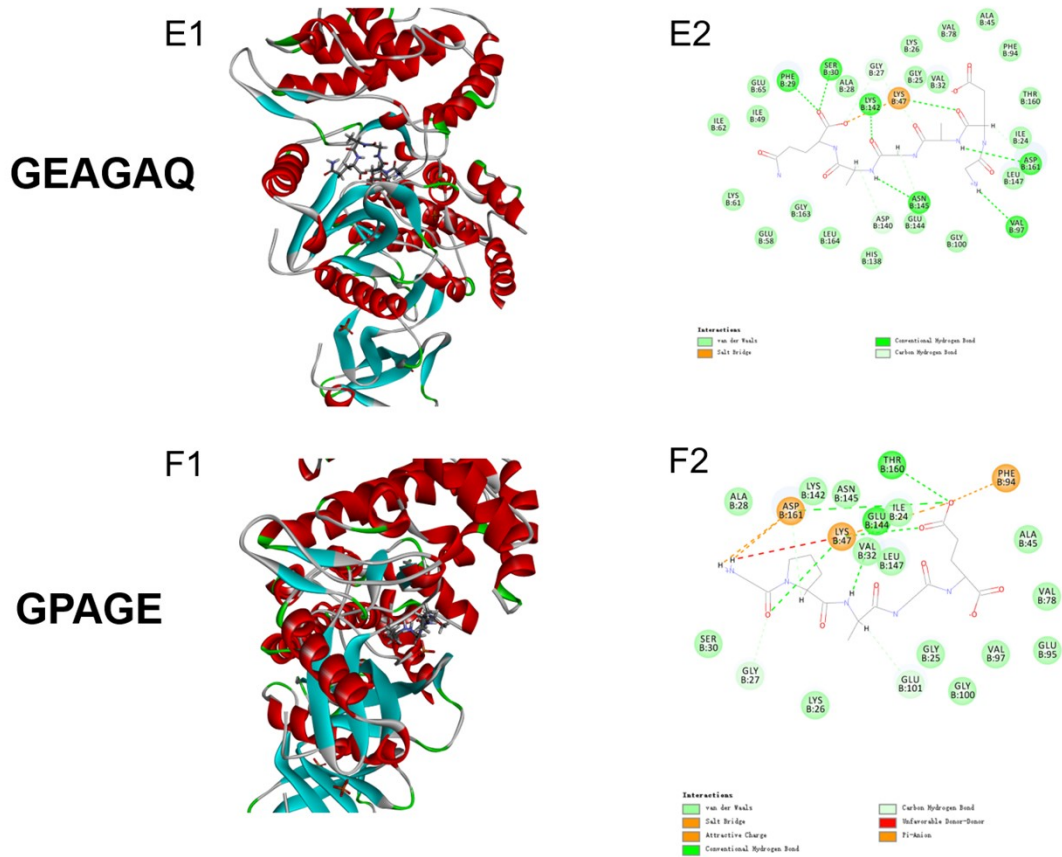

Fig. S3 Molecular docking analysis. (E1) The predicted binding sites of Gly-Glu-Ala-Gly-Ala-Gln in the active pocket of CaMKII; (E2) The detail binding mode between Gly-Glu-Ala-Gly-Ala-Gln and active pocket; (F1) The predicted binding sites of Gly-Pro-Ala-Gly-Glu in the active pocket of CaMKII; (F2) The detail binding mode between Gly-Pro-Ala-Gly-Glu and active pocket.

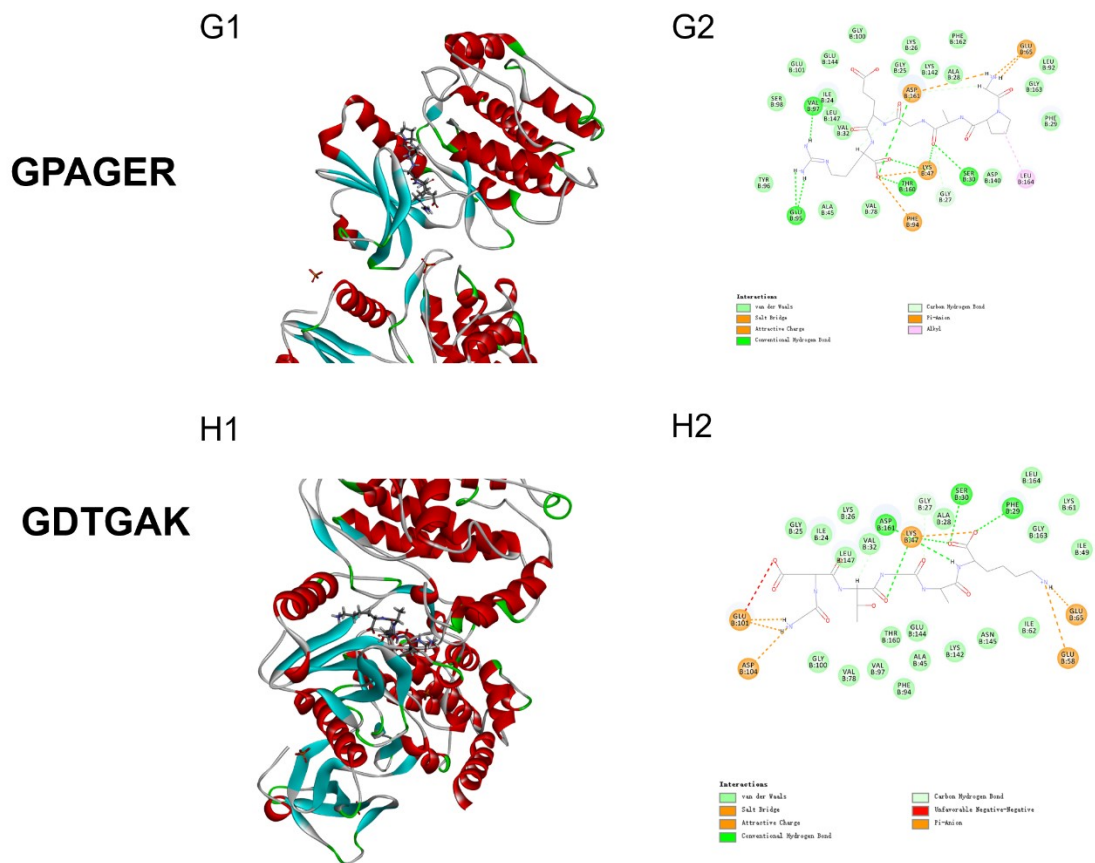

Fig. S4 Molecular docking analysis. (G1) The predicted binding sites of Gly-Pro-Ala-Gly-Glu-Arg in the active pocket of CaMKII; (G2) The detail binding mode between Gly-Pro-Ala-Gly-Glu-Arg and active pocket; (H1) The predicted binding sites of Gly-Asp-Thr-Gly-Ala-Lys in the active pocket of CaMKII; (H2) The detail binding mode between Gly-Asp-Thr-Gly-Ala-Lys and active pocket.
